# Supplementary material
Source: PubMed Central journal article supplement (PMC3916938)
Supplement: NIHMS550208-supplement-1.pdf [file NIHMS550208-supplement-1.pdf]

## Supplemental Figure Legends

**Fig. S1: Dicer deletion in the Pten null mouse model for prostate cancer. (A):** Quantitative RT-PCR analysis of the expression of pre-microRNAs in Pten<sup>-/-</sup>, Pten<sup>-/-</sup>Dicer<sup>+/-</sup>, and Pten<sup>-/-</sup>Dicer<sup>-/-</sup> mice at 15 weeks. **(B):** IHC analysis of phosphor-AKT in prostate tissues from Pten<sup>-/-</sup>, Pten<sup>-/-</sup>Dicer<sup>+/-</sup>, and Pten<sup>-/-</sup>Dicer<sup>-/-</sup> mice at 15 weeks.

**Fig. S2: Suppressing Dicer activity enhances cellular apoptosis and senescence in the Pten null mouse model for prostate cancer.**

**(A):** TUNEL analysis, and **(B):** IHC analysis of cleaved caspase 3 with luminal cell marker K8 in prostate tissues from Pten<sup>-/-</sup>, Pten<sup>-/-</sup>Dicer<sup>+/-</sup>, and Pten<sup>-/-</sup>Dicer<sup>-/-</sup> mice at 15 weeks. Bar graphs show quantifications. Data represent means  $\pm$  SD. \*:  $p < 0.05$ .

**Fig. S3:** QRT-PCR analysis of expression of pre-microRNAs (A) and microRNAs (B) in DU145 cells that express control shRNA and Dicer shRNAs. Data represent means  $\pm$  SD. \*:  $p < 0.05$ .

**Fig. S4: Suppressing Dicer activity attenuates proliferation and tumorigenesis of the human prostate cancer cells.**

**(A-B'')** Bar graphs show quantification of BrdU positive proliferating cells **(A-A'')** and cleaved caspase 3(CC3) positive apoptotic cells **(B-B'')** in the control and Dicer shRNA-expressing CWR22Rv1 (A, B), C4-2 (A', B'), and PC3 (A'', B'') cells in vitro. **(C-C'')** Soft agar assay using the control and Dicer shRNA-expressing CWR22Rv1 (C), C4-2 (C'), and PC3 (C'') cells. **(D-D'')** Bar graphs show quantifications of the soft agar assays. Data represent means  $\pm$  SD. \*:  $p < 0.05$ . **(E)** MTT assays of PC3, DU145, C4-2, CWR22Rv1, and MCF7. Data represent means  $\pm$  SD. \*:  $p < 0.05$ .

**Table S1: Primers for mouse genotyping and qRT-PCR.**

**Table S2: Copy number change of Dicer in human prostate cancer specimens and cell lines.**

# Supplemental Fig. 1

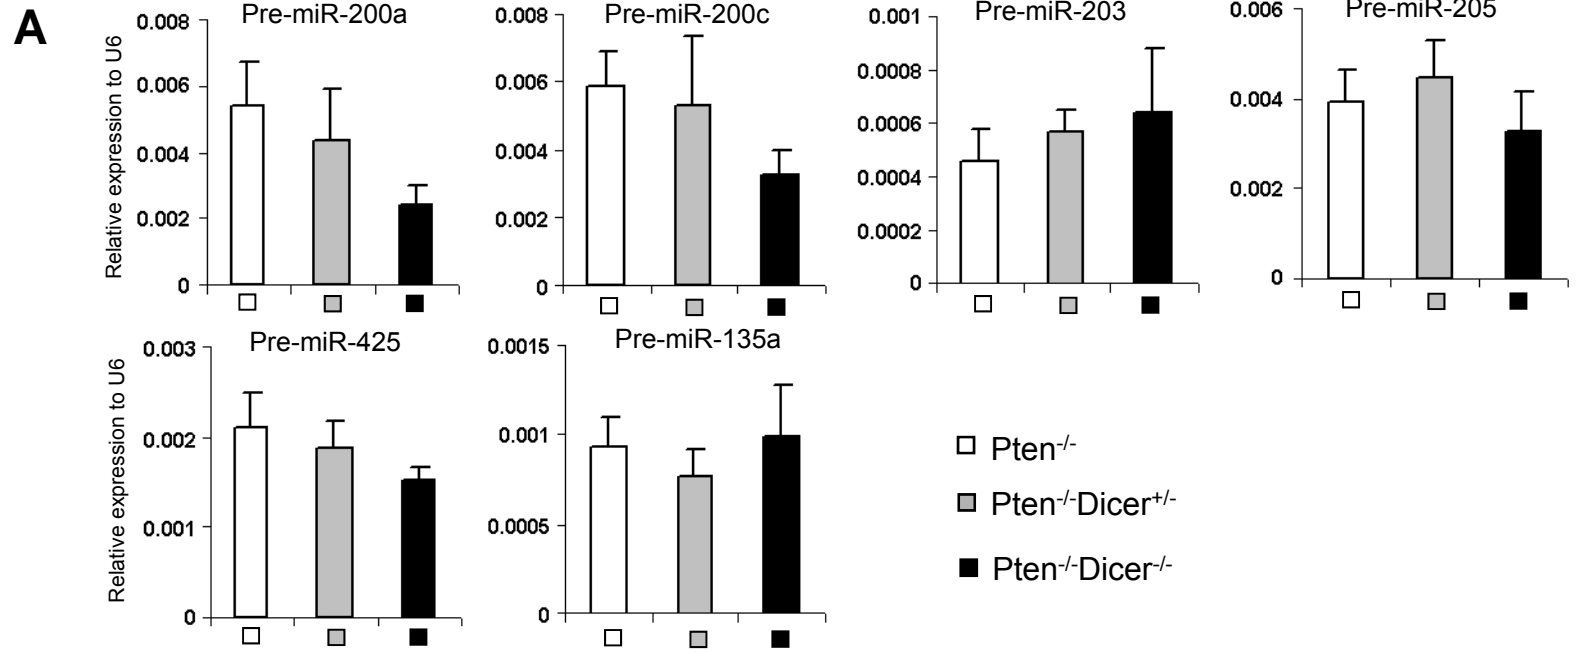

**B**

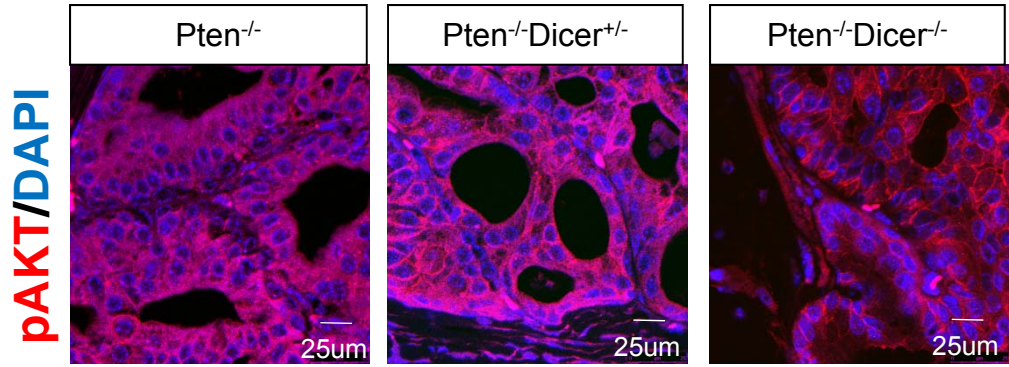

## Supplemental Fig. 2

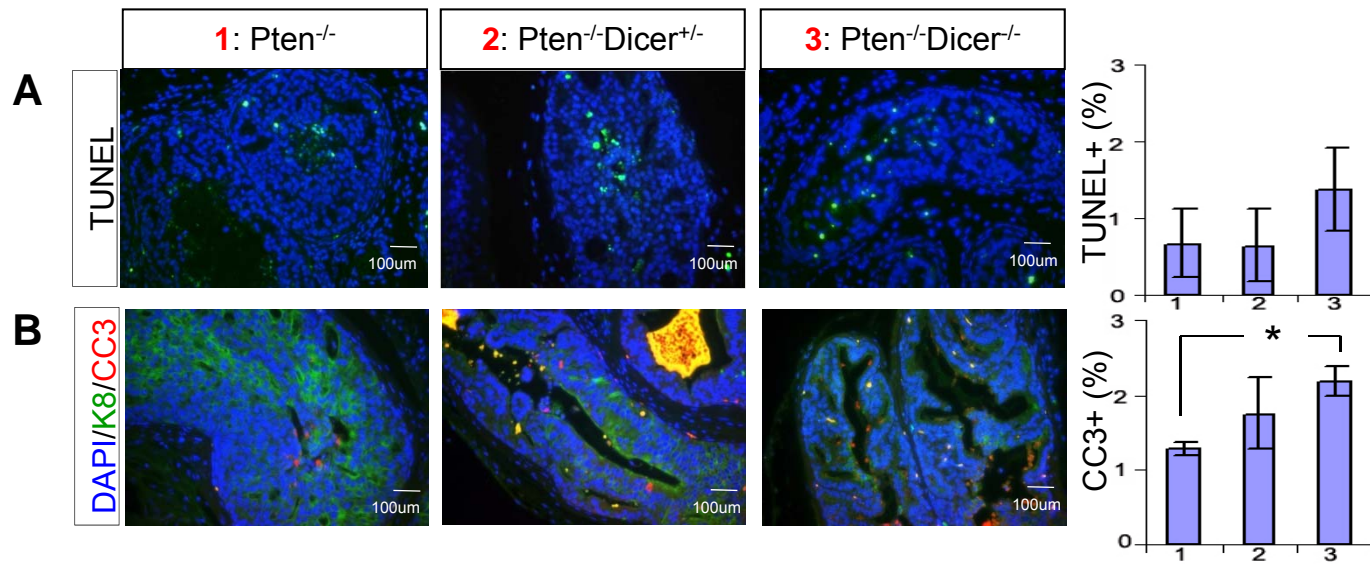

### Supplemental Fig. 3

**A**

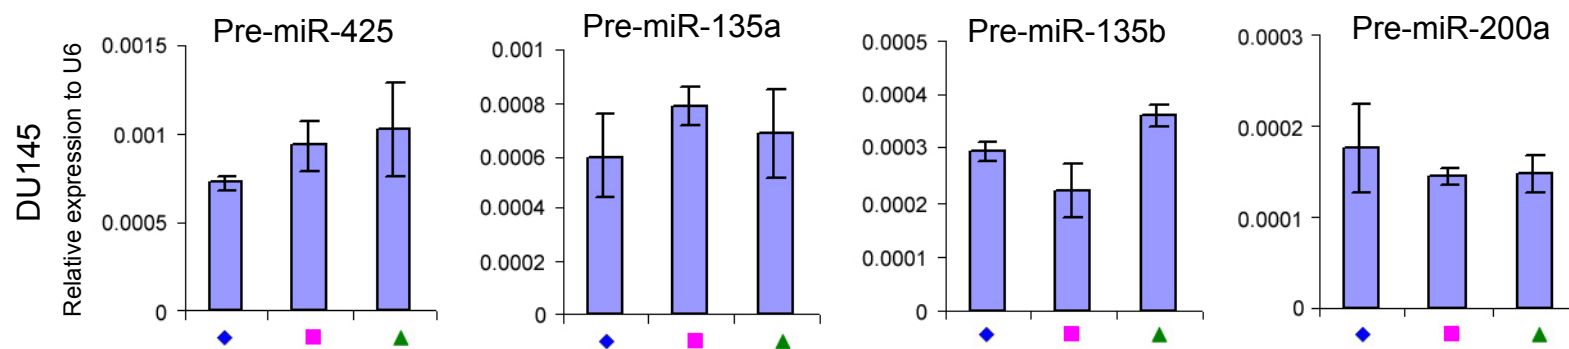

**B**

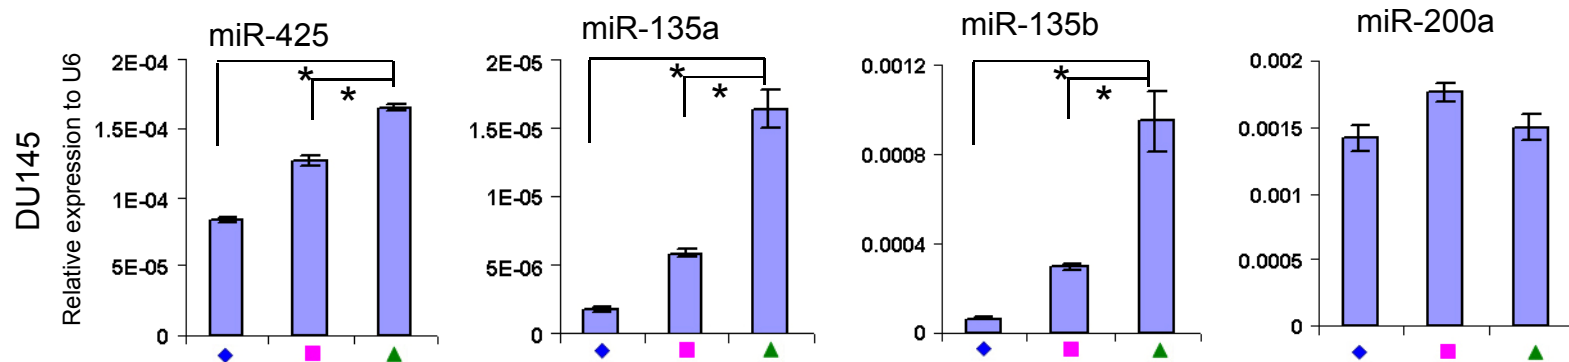

◆ DU145/Dicer-shRNA1    ■ DU145/Dicer-shRNA2    ▲ DU145/Control

## Supplemental Fig. S4

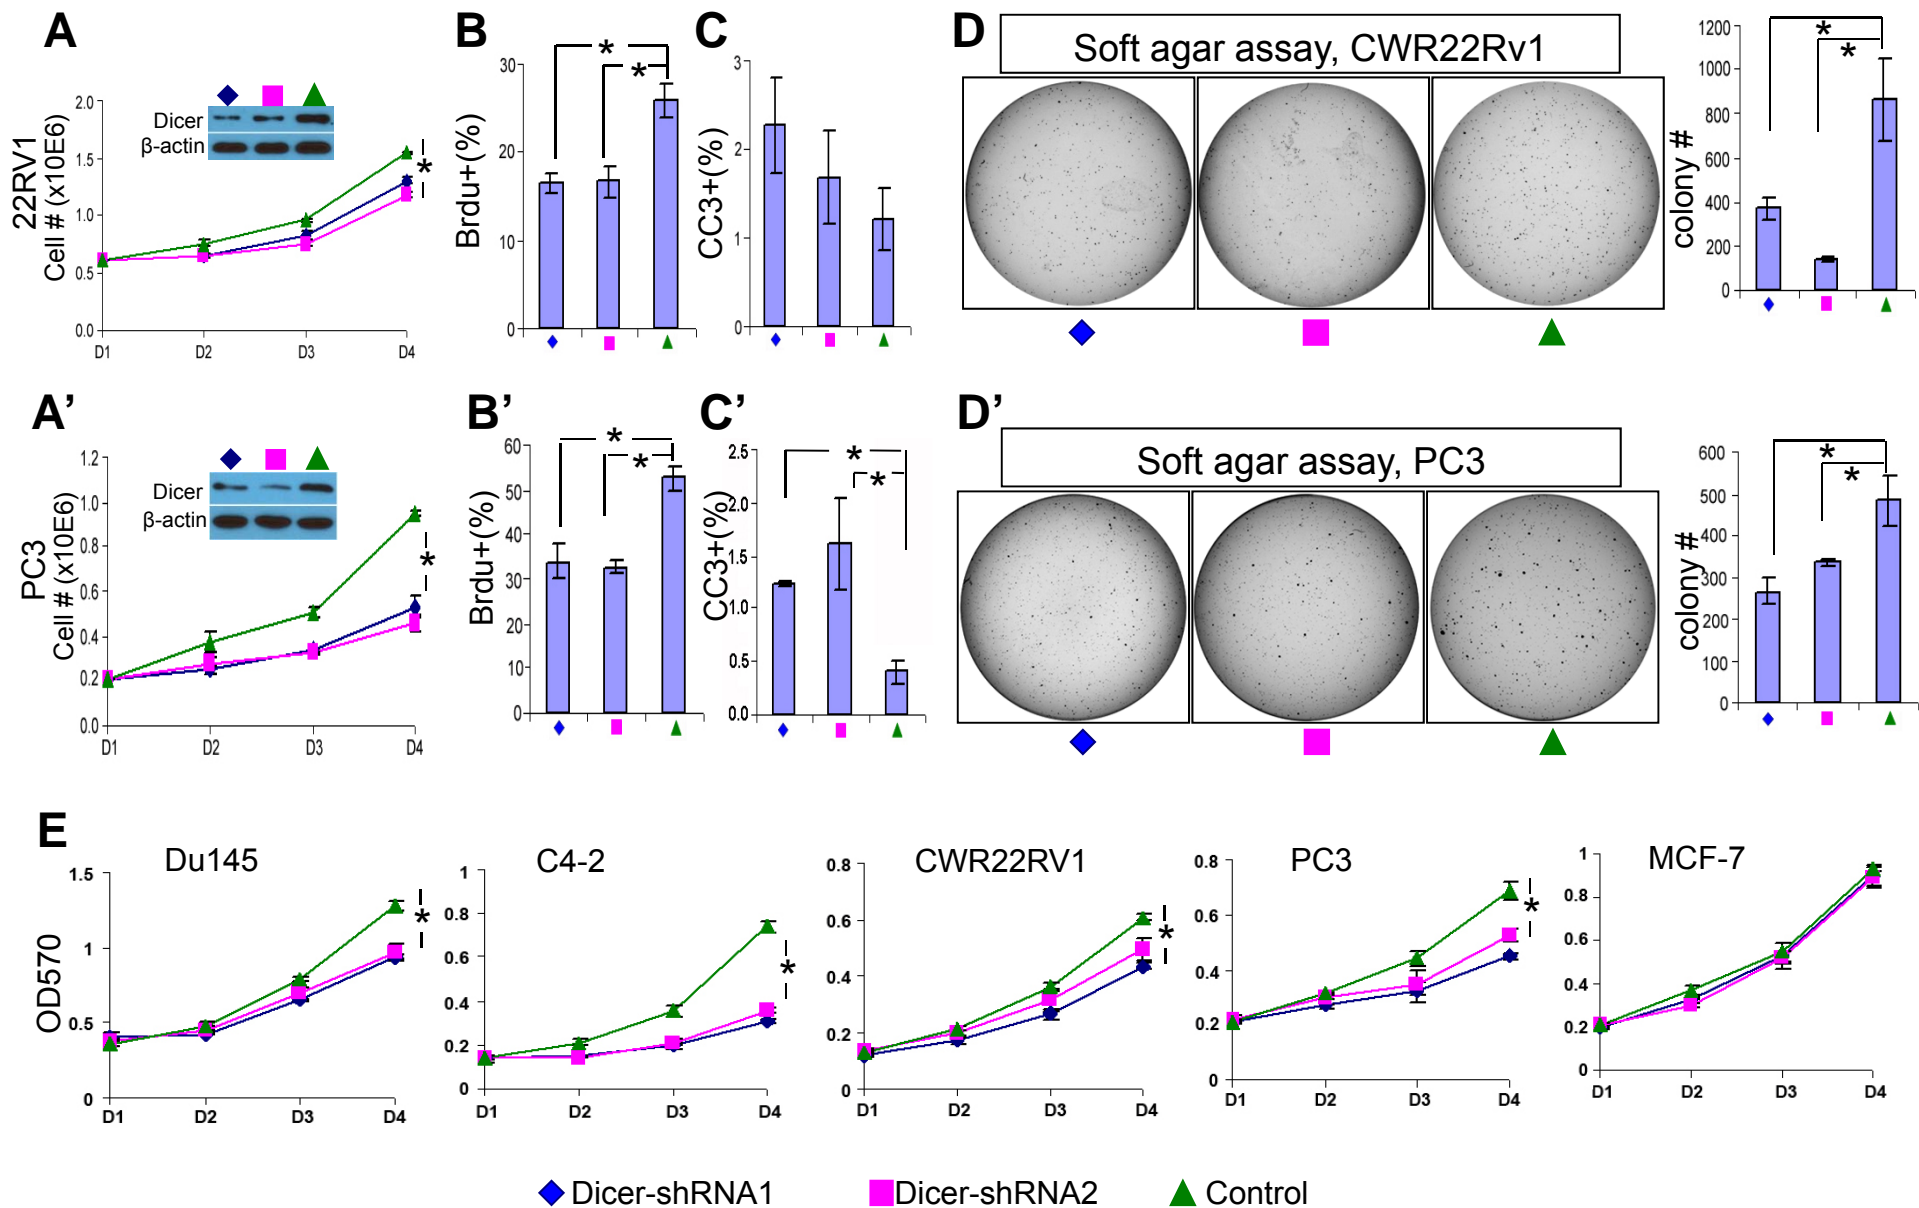

**Supplemental Table 1: Genotyping and qRT-PCR primers**

| Mouse genotyping primers |                             |                      | QRT-PCR primer for pre-miRNA |                        |
|--------------------------|-----------------------------|----------------------|------------------------------|------------------------|
| Dicer F                  | cctgacagtgacggtccaaag       |                      | hsa-200a F                   | cgggcccctgtgagcatc     |
| Dicer R                  | catgactcttcaactcaaact       |                      | hsa-200a R                   | cgggtcacctttgaacatcg   |
| Pten F                   | caagcactctgcaactgag         |                      | hsa-425 F                    | aagcgctttggaatgacacg   |
| Pten R                   | aagttttgaaggcaaga           |                      | hsa-425 R                    | agagcactgggaggacacg    |
| Cre F                    | gcctgcattaccggtcgtatgcaacga |                      | hsa-135a1 F                  | ggcctcgtgttctctatgg    |
| Cre R                    | gtggcagatggcgggcaacaccatt   |                      | has-135a1 R                  | gtccccgctgtcggccacgg   |
| QRT-PCR primers          |                             |                      | hsa-135b F                   | ctctgctgtggcctatggct   |
|                          | Mouse                       | Human                | hsa-135b R                   | gagctgccccctcactgtag   |
| GAPDH F                  | tggtctacccccaatgtgt         | atgttcgtcatgggtgtgaa | mus-200a F                   | tgggcctctgtgggcatc     |
| GAPDH R                  | ggtcctcagtgtagcccaag        | agttgtcatggatgaccttg | mus-200a R                   | tgggtcaccttgaacatcg    |
| Dicer exon24 F           | tccaggggtcttgactgact        | agcgcttccttaagcagtg  | mus-200c F                   | ccgtggccatcttactggg    |
| Dicer exon24 R           | ccaatgatgcaaagatggtg        | ccacagtgatgctggaattg | mus-200c R                   | ccgtcatcattaccaggcag   |
| Dicer exon21F            | gaacatgctgcacatcaagg        |                      | mus-203 F                    | cctggtccagtggttctga    |
| Dicer exon21R            | gcaacctttgcagttcaca         |                      | mus-203 R                    | ccgggtctagtggtcctaaac  |
| BAX F                    | gctgatggcaacttcaactg        |                      | mus-205 F                    | tctgtccttcattccaccg    |
| BAX R                    | gatcagctcgggcactttag        |                      | mus-205 R                    | tcctgagcttcaactcactga  |
| CD95 F                   | tatcaaggaggccccattttg       |                      | mus-425 F                    | agtgctttggaatgacacgatc |
| CD95 R                   | tggtgtacccccattcattt        |                      | mus-425 R                    | gagcactgggaggacacg     |
| Cyclin D2 F              | ccacctggatgctagaggtc        |                      | mus-135a1 F                  | ggcctcactgttctctatggct |
| Cyclin D2 R              | ccaagaacgggtccaggtaa        |                      | mus-135a1 R                  | atcctcaccgtacgccacg    |
| Snail F                  | cttgtgtctgcacgacctgt        |                      | u6 F                         | ctcgcttcggcagcaca      |
| Snail R                  | gagcaggagaatgcttctc         |                      | u6 R                         | aacgcttcacgaatttgcgt   |
| twist2 F                 | aggaccacctgcacatct          |                      |                              |                        |
| twist2 R                 | gtcatgaggagccacaaggt        |                      |                              |                        |
| CTGF F                   | aaccgcaagatcggagtg          |                      |                              |                        |
| CTGF R                   | gctgctttggaaggactcac        |                      |                              |                        |
| FoxC1 F                  | cggcgagcagagctactatc        |                      |                              |                        |
| FoxC1 R                  | tgcgagtacacgctcatagg        |                      |                              |                        |
| MMP7 F                   | atcagtggaacaggctcag         |                      |                              |                        |
| MMP7 R                   | tgcatttccttgaggtgtc         |                      |                              |                        |
| Col5a1 F                 | ttccctggcatcaactgt          |                      |                              |                        |
| Col5a1 R                 | tcgaggatcaaggtgacattt       |                      |                              |                        |
| col6a1 F                 | ctaagcgcttcattgacaacc       |                      |                              |                        |
| col6a1 R                 | tgatctccacctcgtcactg        |                      |                              |                        |
| Tgfβ1F                   | attcagcgctcactgctctt        |                      |                              |                        |
| Tgfβ1 R                  | ggttcatgtcatggatggtg        |                      |                              |                        |

**Supplemental Table 2: Copy number change of Dicer in human prostate cancer specimens and cell lines**

|                   | Dice copy number change |     |    |     |
|-------------------|-------------------------|-----|----|-----|
| Tumor types       | No change               | -1  | -2 | +1  |
| PRIMARY (n = 130) | 127                     | 2   | 1  | 0   |
| MET (n = 19)      | 12                      | 5   | 0  | 2   |
| DU145             |                         |     |    | yes |
| LNCaP             | yes                     |     |    |     |
| LNCaP104S         |                         | yes |    |     |
| PC3               |                         |     |    | yes |
| VCaP              | yes                     |     |    |     |
